# Supplementary material for: Wearable threads for monitoring sanitizer quality using dye displacement assay
Source: Royal Society of Chemistry journal article supplement (doi:10.1039/d4ra04379k), 2024-01-01
Supplement: d4ra04379k1.pdf [file d4ra04379k1.pdf]

## Wearable Threads for Monitoring Sanitizer Quality Using Dye Displacement Assay

Pratham Joshi<sup>a‡</sup>, Akhiya Shinde<sup>a‡</sup>, Sukanya Sudhiram<sup>b</sup>, Bibhu Ranjan Sarangi<sup>b,c</sup>, Naresh Kumar Mani<sup>a\*</sup>

### Supplementary Material

**Supplementary Table 1:** Compositions of simulated sanitizers containing 55 % (v/v), 75 % (v/v) and 85 % (v/v) ethanol. Total preparation volume: 20 mL

| <b>Simulated sanitizer composition</b>                  | <b>55 % (v/v) simulated sanitizer</b> | <b>75 % (v/v) simulated sanitizer</b> | <b>85 % (v/v) simulated sanitizer</b> |
|---------------------------------------------------------|---------------------------------------|---------------------------------------|---------------------------------------|
| Ethanol (mL)                                            | 11                                    | 15                                    | 17                                    |
| Glycerine (mL)                                          | 0.29                                  | 0.29                                  | 0.29                                  |
| Hydrogen Peroxide (H <sub>2</sub> O <sub>2</sub> ) (mL) | 0.1                                   | 0.1                                   | 0.1                                   |
| Water (mL)                                              | 8.61                                  | 4.61                                  | 2.61                                  |
